# Supplementary material
Source: publisher site journal article supplement (https://www.dovepress.com/article/451357)
Supplement: Supplementary file 1 [file get_supplementary_file.php]

## Supplementary Materials


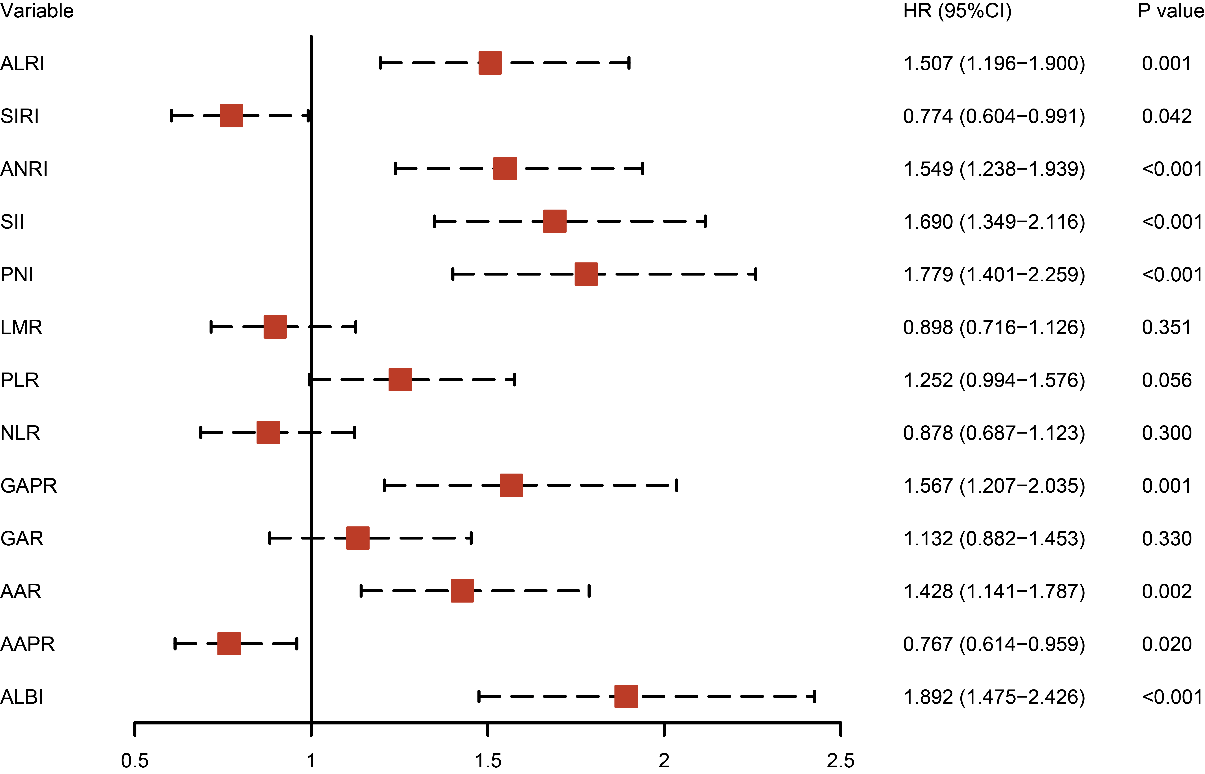


**Supplementary Figure 1** Forest plot of univariate Cox regression analysis of liver function, nutrition, inflammation, and immune-related indices. ALRI, aspartate aminotransferase to lymphocyte ratio; SIRI, systemic inflammation response index; ANRI, aspartate aminotransferase to neutrophil ratio; SII, systemic Immune-Inflammation; PNI, prognostic nutritional index; LMR, lymphocyte to monocyte ratio; PLR, platelet-to-lymphocyte ratio; NLR, neutrophil-to-lymphocyte ratio; GAPR, gamma-glutamyl transpeptidase-to-alkaline phosphatase ratio; GAR, gamma-glutamyl transpeptidase-to-aspartate aminotransferase ratio; AAR, alanine aminotransferase-to-aspartate aminotransferase ratio; AAPR, albumin to alkaline phosphatase ratio; ALBI, albumin-bilirubin ratio.

**
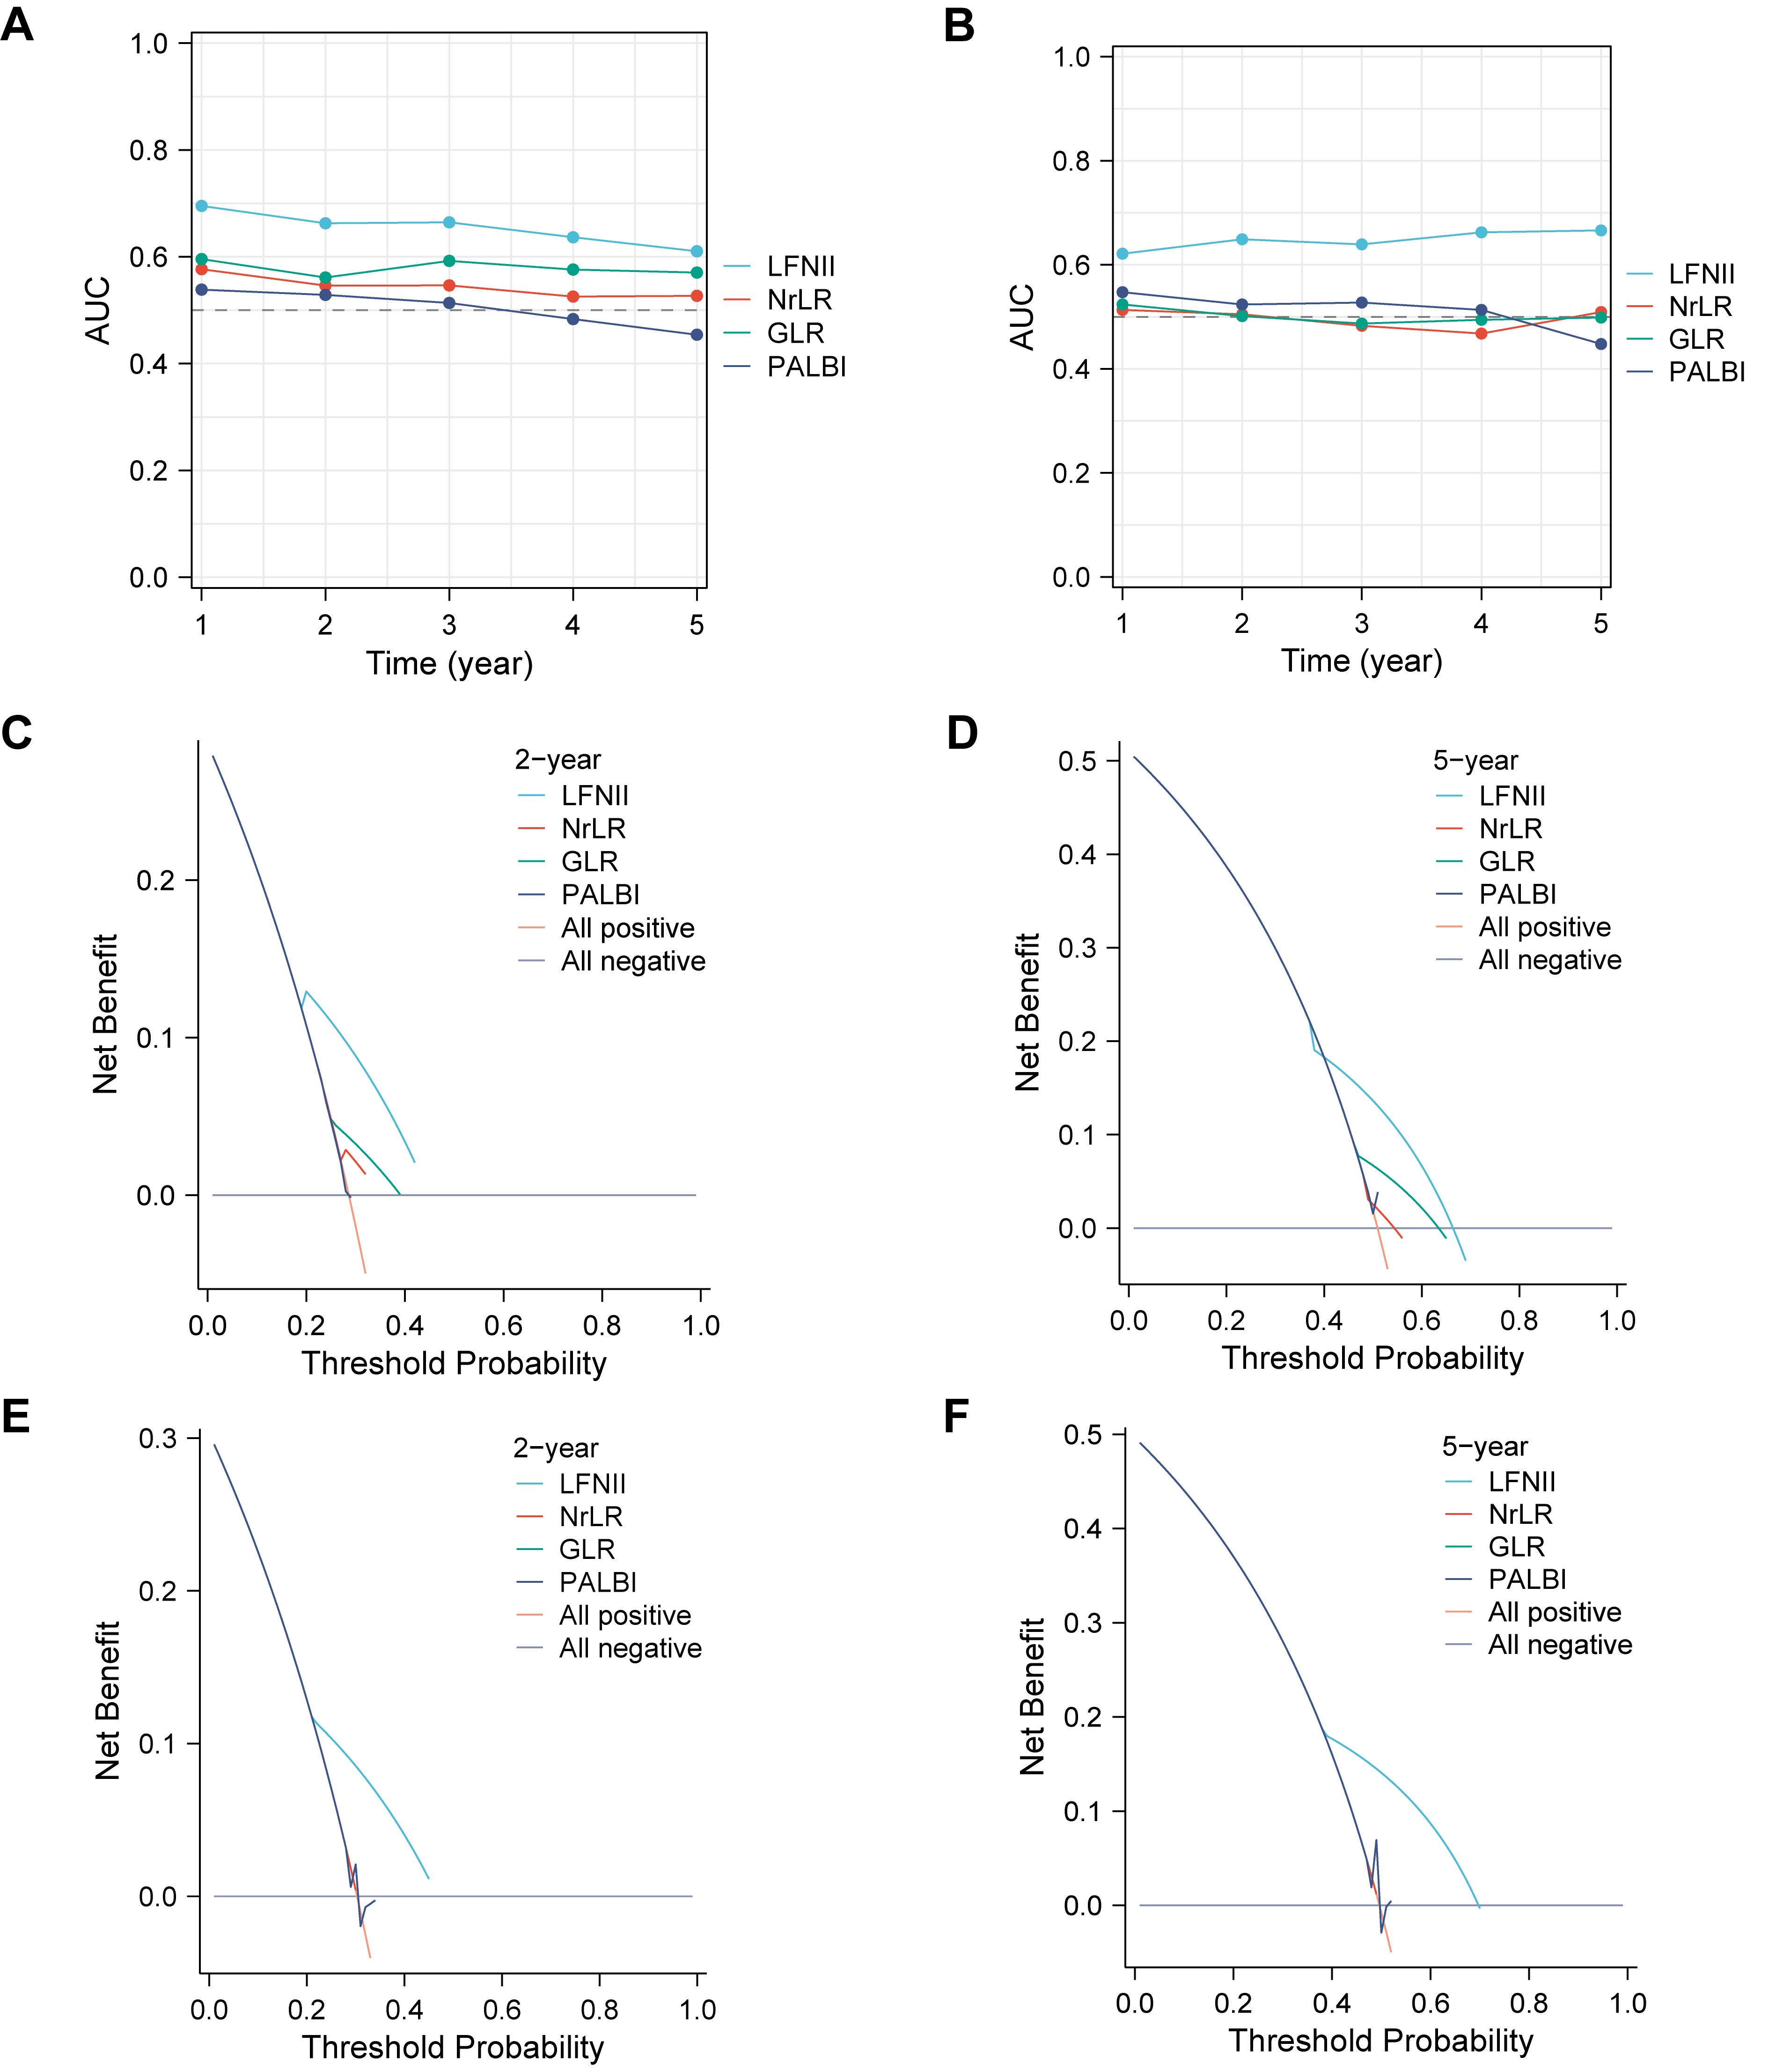
**

**Supplementary Figure 2** Comparison of LFNII score and prognostic indicators defined in previous studies [28,30-31]. Time-dependent AUC in the training (A) and validation (B) sets showed that LFNII score had better predictive power than other prognostic indicators. The clinical application value of LFNII score in the training (C-D) and validation (E-F) sets at 2 and 5 years was better than that of other prognostic indicators. LFNII, liver function-nutrition-inflammation-immune; AUC, area under the curve; NrLR, neutrophil times γ-glutamyl transpeptidase to lymphocyte ratio; GLR, γ-glutamyl transpeptidase to lymphocyte count ratio; PALBI, platelet-albumin-bilirubin score.

**
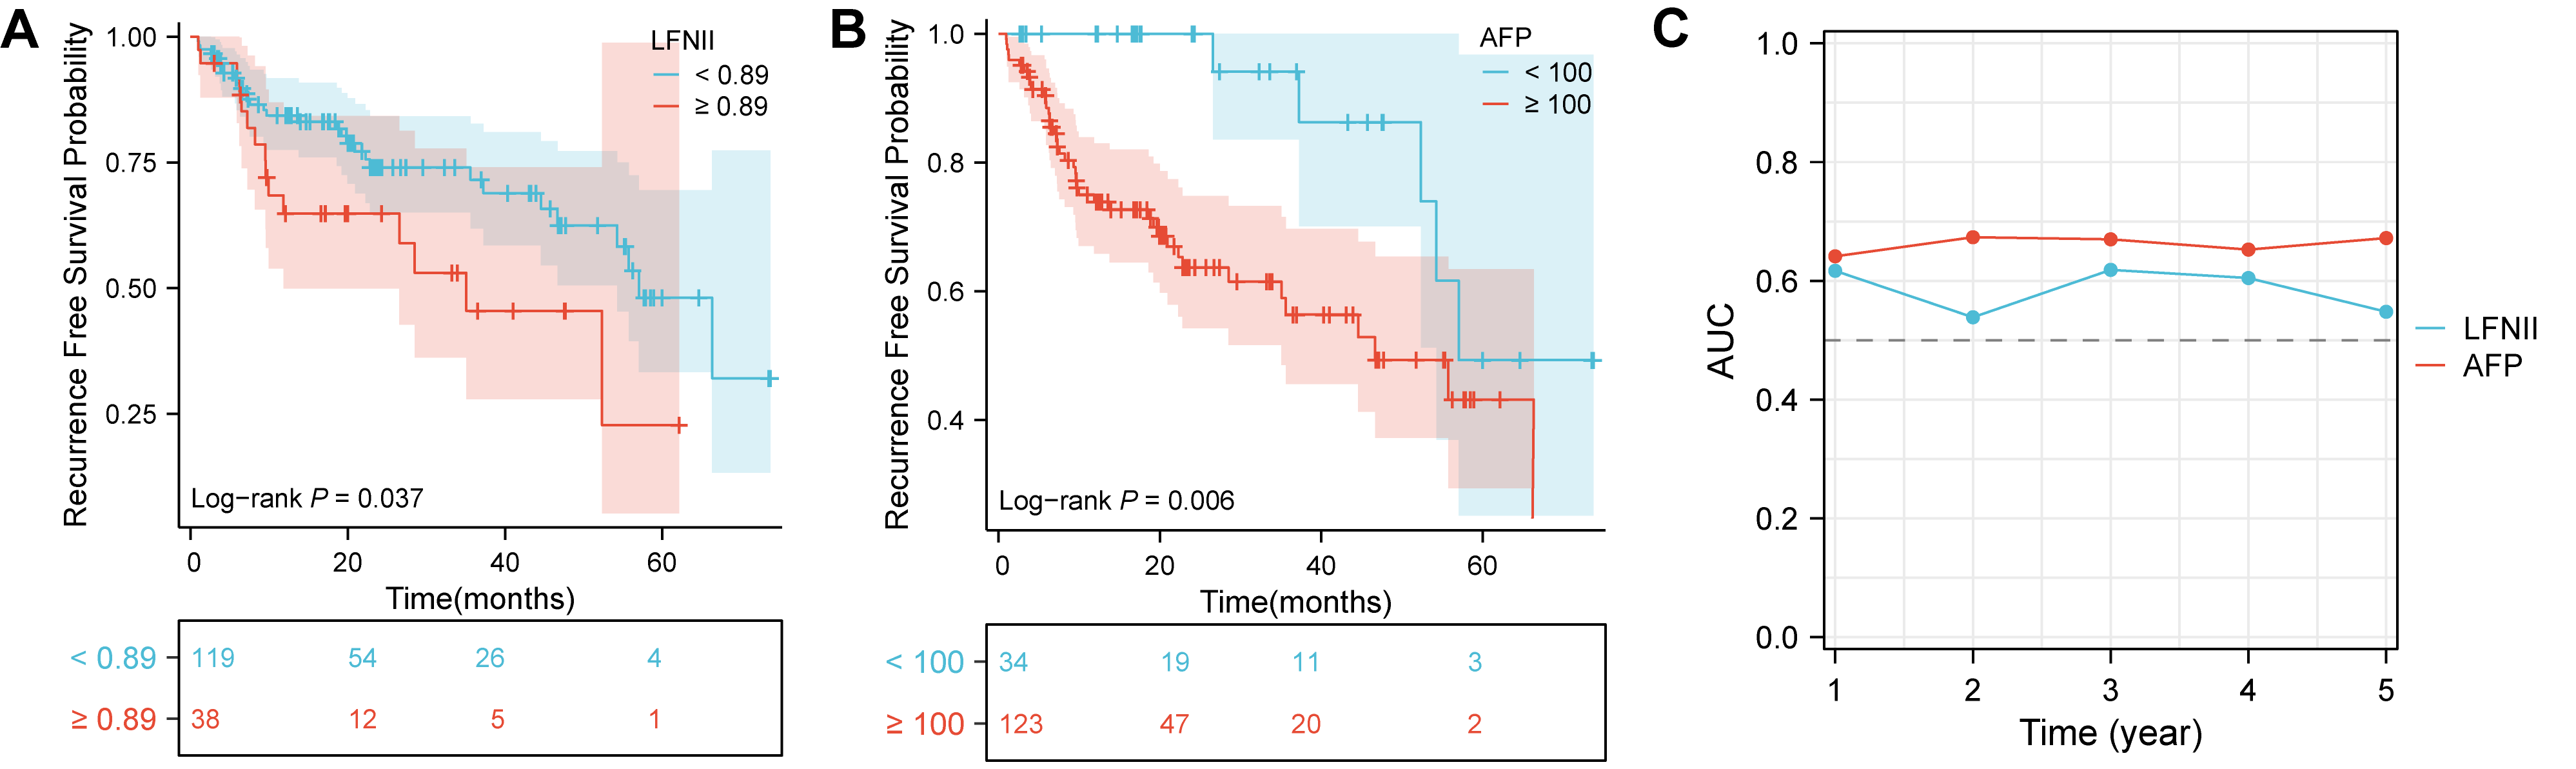
**

**Supplementary Figure 3** LFNII score as an important predictor of postoperative recurrence of AFP-positive HCC. The Kaplan–Meier curves showed that high LFNII score (A) and high AFP (B) were closely related to postoperative recurrence of AFP-positive HCC. (C) Time-dependent AUC suggested that the predictive power of AFP exceeded that of the LFNII score. LFNII, liver function-nutrition-inflammation-immune; AFP, alpha-fetoprotein; AUC, area under the curve.

**Supplementary Table 1** Baseline data of patients with AFP-positive HCC

| Variables | All patients (N=157) |
| --- | --- |
| Age, years |  |
| <60 | 108 (68.8%) |
| ≥60 | 49 (31.2%) |
| Sex |  |
| Male | 118 (75.2%) |
| Female | 39 (24.8%) |
| HBV infection |  |
| No | 122 (77.7%) |
| Yes | 35 (22.3%) |
| HCV infection |  |
| No | 148 (94.3%) |
| Yes | 9 (5.7%) |
| Number of tumors |  |
| Single | 147 (93.6%) |
| Multiple | 10 (6.4%) |
| Maximum diameter of the largest tumor, cm |  |
| <5 | 129 (82.2%) |
| ≥5 | 28 (17.8%) |
| Liver capsule invasion |  |
| No | 92 (58.6%) |
| Yes | 65 (41.4%) |
| Edmondson Steiner grade |  |
| I-II | 88 (56.1%) |
| III-IV | 69 (43.9%) |
| MVI |  |
| No | 85 (54.1%) |
| Yes | 72 (45.9%) |
| Satellite nodule |  |
| No | 138 (87.9%) |
| Yes | 19 (12.1%) |
| Scheuer scoring system |  |
| S0-S1 | 47 (29.9%) |
| S2-S4 | 110 (70.1%) |
| ATS score |  |
| <5.18 | 24 (15.3%) |
| ≥5.18 | 133 (84.7%) |
| AJCC-TNM stage |  |
| I | 86 (54.8%) |
| II | 59 (37.6%) |
| III | 10 (6.4%) |
| IV | 2 (1.3%) |
| BCLC stage |  |
| 0 | 20 (12.7%) |
| A | 119 (75.8%) |
| B | 13 (8.3%) |
| C | 5 (3.2%) |
| ALRI |  |
| ≤14.5 | 67 (42.7%) |
| >14.5 | 90 (57.3%) |
| SIRI |  |
| <0.48 | 38 (24.2%) |
| ≥0.48 | 119 (75.8%) |
| ANRI |  |
| ≤10.8 | 110 (70.1%) |
| >10.8 | 47 (29.9%) |
| SII |  |
| ≤497.3 | 120 (76.4%) |
| >497.3 | 37 (23.6%) |
| PNI |  |
| >47.55 | 151 (96.2%) |
| ≤47.55 | 6 (3.8%) |
| LMR |  |
| <4 | 34 (21.7%) |
| ≥4 | 123 (78.3%) |
| PLR |  |
| ≥95.93 | 86 (54.8%) |
| <95.93 | 71 (45.2%) |
| NLR |  |
| <1.37 | 31 (19.7%) |
| ≥1.37 | 126 (80.3%) |
| GAPR |  |
| ≤0.35 | 53 (33.8%) |
| >0.35 | 104 (66.2%) |
| GAR |  |
| ≤1.05 | 57 (36.3%) |
| >1.05 | 100 (63.7%) |
| AAR |  |
| <1.03 | 86 (54.8%) |
| ≥1.03 | 71 (45.2%) |
| AAPR |  |
| <0.53 | 58 (36.9%) |
| ≥0.53 | 99 (63.1%) |
| ALBI grade |  |
| 1 | 145 (92.4%) |
| 2-3 | 12 (7.6%) |
| LFNII |  |
| <0.89 | 119 (75.8%) |
| ≥0.89 | 38 (24.2%) |
| AFP |  |
| <100 | 34 (21.7%) |
| ≥100 | 123 (78.3%) |

**Abbreviations:** HBV, hepatitis B virus; HCV, hepatitis C virus; MVI, microvascular invasion; ATS, Alpha-Feto Protein, and Tumor Burden Score; AJCC, American Joint Committee on Cancer; BCLC, Barcelona Clinic Liver Cancer; ALRI, aspartate aminotransferase to lymphocyte ratio; SIRI, systemic inflammation response index; ANRI, aspartate aminotransferase to neutrophil ratio; SII, systemic Immune-Inflammation; PNI, prognostic nutritional index; LMR, lymphocyte-to -monocyte ratio; PLR, platelet-to-lymphocyte ratio; NLR, neutrophil-to-lymphocyte ratio; GAPR, gamma-glutamyl transpeptidase-to-alkaline phosphatase ratio; GAR, gamma-glutamyl transpeptidase-to-aspartate aminotransferase ratio; AAR, alanine aminotransferase-to-aspartate aminotransferase ratio; AAPR, albumin-to-alkaline phosphatase ratio; ALBI, albumin-bilirubin; LFNII, liver function-nutrition-inflammation-immune; AFP, alpha-fetoprotein.

**Supplementary Table 2** Comparison of clinicopathological characteristics between the low- and high LFNII score groups.

| Variables | All patients (N=661) | Low LFNII score group (N=398) | High LFNII score group (N=263) | P value |
| --- | --- | --- | --- | --- |
| Age, years |  |  |  | 0.953 |
| <60 | 452 (68.4%) | 273 (68.6%) | 179 (68.1%) |  |
| ≥60 | 209 (31.6%) | 125 (31.4%) | 84 (31.9%) |  |
| Sex |  |  |  | 0.381 |
| Male | 588 (89.0%) | 358 (89.9%) | 230 (87.5%) |  |
| Female | 73 (11.0%) | 40 (10.1%) | 33 (12.5%) |  |
| Family history of malignant tumors |  |  |  | 0.217 |
| No | 518 (78.4%) | 305 (76.6%) | 213 (81.0%) |  |
| Yes | 143 (21.6%) | 93 (23.4%) | 50 (19.0%) |  |
| Diabetes |  |  |  | 0.769 |
| No | 565 (85.5%) | 342 (85.9%) | 223 (84.8%) |  |
| Yes | 96 (14.5%) | 56 (14.1%) | 40 (15.2%) |  |
| Alcoholism |  |  |  | 0.532 |
| No | 376 (56.9%) | 222 (55.8%) | 154 (58.6%) |  |
| Yes | 285 (43.1%) | 176 (44.2%) | 109 (41.4%) |  |
| Smoking |  |  |  | 0.103 |
| No | 350 (53.0%) | 200 (50.3%) | 150 (57.0%) |  |
| Yes | 311 (47.0%) | 198 (49.7%) | 113 (43.0%) |  |
| HBV infection |  |  |  | 0.34 |
| No | 147 (22.2%) | 94 (23.6%) | 53 (20.2%) |  |
| Yes | 514 (77.8%) | 304 (76.4%) | 210 (79.8%) |  |
| HCV infection |  |  |  | 0.748 |
| No | 617 (93.3%) | 370 (93.0%) | 247 (93.9%) |  |
| Yes | 44 (6.66%) | 28 (7.04%) | 16 (6.08%) |  |
| BMI |  |  |  | 0.455 |
| <28 | 566 (85.6%) | 337 (84.7%) | 229 (87.1%) |  |
| ≥28 | 95 (14.4%) | 61 (15.3%) | 34 (12.9%) |  |
| Operation duration |  |  |  | 0.757 |
| <190 | 386 (58.4%) | 230 (57.8%) | 156 (59.3%) |  |
| ≥190 | 275 (41.6%) | 168 (42.2%) | 107 (40.7%) |  |
| Intraoperative blood loss |  |  |  | <0.001 |
| ≤200 | 424 (64.1%) | 277 (69.6%) | 147 (55.9%) |  |
| >200 | 237 (35.9%) | 121 (30.4%) | 116 (44.1%) |  |
| Intraoperative blood transfusion |  |  |  | <0.001 |
| No | 546 (82.6%) | 360 (90.5%) | 186 (70.7%) |  |
| Yes | 115 (17.4%) | 38 (9.55%) | 77 (29.3%) |  |
| Number of tumors |  |  |  | 0.151 |
| Single | 600 (90.8%) | 367 (92.2%) | 233 (88.6%) |  |
| Multiple | 61 (9.23%) | 31 (7.79%) | 30 (11.4%) |  |
| Maximum diameter of the largest tumor |  |  |  | <0.001 |
| <5 | 480 (72.6%) | 315 (79.1%) | 165 (62.7%) |  |
| ≥5 | 181 (27.4%) | 83 (20.9%) | 98 (37.3%) |  |
| Liver capsule invasion |  |  |  | 0.033 |
| No | 379 (57.3%) | 242 (60.8%) | 137 (52.1%) |  |
| Yes | 282 (42.7%) | 156 (39.2%) | 126 (47.9%) |  |
| Edmondson Steiner grade |  |  |  | <0.001 |
| I-II | 135 (20.4%) | 110 (27.6%) | 25 (9.51%) |  |
| III-IV | 526 (79.6%) | 288 (72.4%) | 238 (90.5%) |  |
| MVI |  |  |  | <0.001 |
| No | 375 (56.7%) | 273 (68.6%) | 102 (38.8%) |  |
| Yes | 286 (43.3%) | 125 (31.4%) | 161 (61.2%) |  |
| Satellite nodule |  |  |  | 0.446 |
| No | 625 (94.6%) | 379 (95.2%) | 246 (93.5%) |  |
| Yes | 36 (5.45%) | 19 (4.77%) | 17 (6.46%) |  |
| Scheuer scoring system |  |  |  | <0.001 |
| S0-S1 | 135 (20.4%) | 110 (27.6%) | 25 (9.51%) |  |
| S2-S4 | 526 (79.6%) | 288 (72.4%) | 238 (90.5%) |  |
| ATS score |  |  |  | <0.001 |
| <5.18 | 481 (72.8%) | 316 (79.4%) | 165 (62.7%) |  |
| ≥5.18 | 180 (27.2%) | 82 (20.6%) | 98 (37.3%) |  |
| AJCC-TNM stage |  |  |  | <0.001 |
| I | 347 (52.5%) | 254 (63.8%) | 93 (35.4%) |  |
| II | 275 (41.6%) | 132 (33.2%) | 143 (54.4%) |  |
| III | 35 (5.30%) | 11 (2.76%) | 24 (9.13%) |  |
| IV | 4 (0.61%) | 1 (0.25%) | 3 (1.14%) |  |
| BCLC stage |  |  |  | 0.014 |
| 0 | 130 (19.7%) | 87 (21.9%) | 43 (16.3%) |  |
| A | 489 (74.0%) | 293 (73.6%) | 196 (74.5%) |  |
| B | 39 (5.90%) | 18 (4.52%) | 21 (7.98%) |  |
| C | 3 (0.45%) | 0 (0.00%) | 3 (1.14%) |  |

**Abbreviations:** LFNII, liver function-nutrition-inflammation-immune; HBV, Hepatitis B Virus; HCV Hepatitis C Virus; BMI, body mass index; MVI, microvascular invasion; ATS, alpha-fetoprotein, and Tumor Burden Score; AJCC-TNM, American Joint Committee on Cancer tumor–node–metastasis; BCLC, Barcelona Clinic Liver Cancer.
